# Supplementary material for: Gametophytic self-incompatibility in Andean capuli (Prunus serotina subsp. capuli): allelic diversity at the S-RNase locus influences normal pollen-tube formation during fertilization
Source: PeerJ. 2020 Aug 31;8:e9597. doi: 10.7717/peerj.9597 (PMC7469932; doi:10.7717/peerj.9597)
Supplement: Data S1 [file peerj-08-9597-s007.xlsx]

## Sheet: Hoja1
Raw Data. Pollen tube growth Raw Data. Number of pollen tubes counted in each of the portions of the style. The Pistil number column indicates the number of pistils analyzed for each of the 8 crosses performed
	Pollen donor and Pollen receptor columnes indicate the number of the trees employed for the cross. The S allelic composition of each tree is indicated in parenthesis.
	The Cross type column indicates the expected outcome of the cross according to the S-allelic composition of the parental trees. Self-pollintations are considered incompatible crosses.
				Style
Pistil number	Cross type	Pollen donor	Pollen receptor	Upper third	Middle third	Bottom third	Total number of pollen tubes in the pistil	Global percentage of pollen tubes reaching the lower third of the style
1	Compatible	17 (S1, S4)	1 (S8, S19)	140	46	10	196	5.4242
2	Compatible	17 (S1, S4)	1 (S8, S19)	172	34	6	212
3	Compatible	17 (S1, S4)	1 (S8, S19)	40	10	3	53
4	Compatible	17 (S1, S4)	1 (S8, S19)	44	6	4	54
5	Compatible	17 (S1, S4)	1 (S8, S19)	40	10	4	54
6	Compatible	17 (S1, S4)	1 (S8, S19)	64	18	8	90
7	Compatible	17 (S1, S4)	1 (S8, S19)	44	12	4	60
1	Compatible	14 (S20, S21)	15 (S10, S6)	80	18	5	103	4.2836
2	Compatible	14 (S20, S21)	15 (S10, S6)	100	18	6	124
3	Compatible	14 (S20, S21)	15 (S10, S6)	32	8	4	44
4	Compatible	14 (S20, S21)	15 (S10, S6)	120	10	4	134
5	Compatible	14 (S20, S21)	15 (S10, S6)	128	12	5	145
6	Compatible	14 (S20, S21)	15 (S10, S6)	24	10	1	35
7	Compatible	14 (S20, S21)	15 (S10, S6)	20	2	1	23
8	Compatible	14 (S20, S21)	15 (S10, S6)	20	2	1	23
9	Compatible	14 (S20, S21)	15 (S10, S6)	20	2	1	23
10	Compatible	14 (S20, S21)	15 (S10, S6)	20	2	1	23
1	Self-pollination	17 (S1, S4)	17 (S1, S4)	80	16	5	101	3.31754
2	Self-pollination	17 (S1, S4)	17 (S1, S4)	60	14	3	77
3	Self-pollination	17 (S1, S4)	17 (S1, S4)	100	20	4	124
4	Self-pollination	17 (S1, S4)	17 (S1, S4)	32	4	5	41
5	Self-pollination	17 (S1, S4)	17 (S1, S4)	76	28	2	106
6	Self-pollination	17 (S1, S4)	17 (S1, S4)	60	28	2	90
7	Self-pollination	17 (S1, S4)	17 (S1, S4)	24	28	0	52
8	Self-pollination	17 (S1, S4)	17 (S1, S4)	40	2	0	42
1	Incompatible	22 (S1, S4)	17 (S1, S4)	84	22	6	112	3.4134
2	Incompatible	22 (S1, S4)	17 (S1, S4)	76	32	4	112
3	Incompatible	22 (S1, S4)	17 (S1, S4)	88	24	7	119
4	Incompatible	22 (S1, S4)	17 (S1, S4)	112	16	11	139
5	Incompatible	22 (S1, S4)	17 (S1, S4)	124	28	4	156
6	Incompatible	22 (S1, S4)	17 (S1, S4)	120	24	3	147
7	Incompatible	22 (S1, S4)	17 (S1, S4)	32	10	2	44
8	Incompatible	22 (S1, S4)	17 (S1, S4)	140	10	2	152
9	Incompatible	22 (S1, S4)	17 (S1, S4)	48	12	1	61
10	Incompatible	22 (S1, S4)	17 (S1, S4)	20	4	1	25
11	Incompatible	22 (S1, S4)	17 (S1, S4)	44	16	8	68
12	Incompatible	22 (S1, S4)	17 (S1, S4)	60	12	5	77
13	Incompatible	22 (S1, S4)	17 (S1, S4)	48	20	0	68
14	Incompatible	22 (S1, S4)	17 (S1, S4)	36	0	0	36
15	Incompatible	22 (S1, S4)	17 (S1, S4)	40	6	0	46
16	Incompatible	22 (S1, S4)	17 (S1, S4)	52	2	0	54
17	Incompatible	22 (S1, S4)	17 (S1, S4)	96	0	0	96
18	Incompatible	22 (S1, S4)	17 (S1, S4)	68	2	0	70
1	Self-pollination	1 (S8, S19)	1 (S8, S19)	104	0	3	107	2.0339
2	Self-pollination	1 (S8, S19)	1 (S8, S19)	64	0	2	66
3	Self-pollination	1 (S8, S19)	1 (S8, S19)	44	18	0	62
4	Self-pollination	1 (S8, S19)	1 (S8, S19)	112	34	0	146
5	Self-pollination	1 (S8, S19)	1 (S8, S19)	52	10	0	62
6	Self-pollination	1 (S8, S19)	1 (S8, S19)	16	2	1	19
7	Self-pollination	1 (S8, S19)	1 (S8, S19)	16	12	4	32
8	Self-pollination	1 (S8, S19)	1 (S8, S19)	68	4	2	74
9	Self-pollination	1 (S8, S19)	1 (S8, S19)	8	8	0	16
10	Self-pollination	1 (S8, S19)	1 (S8, S19)	4	2	0	6
1	Self-pollination	13 (S4, S9)	13 (S4, S9)	128	28	1	157	1.65289
2	Self-pollination	13 (S4, S9)	13 (S4, S9)	104	10	1	115
3	Self-pollination	13 (S4, S9)	13 (S4, S9)	60	20	4	84
4	Self-pollination	13 (S4, S9)	13 (S4, S9)	76	10	1	87
5	Self-pollination	13 (S4, S9)	13 (S4, S9)	12	2	1	15
6	Self-pollination	13 (S4, S9)	13 (S4, S9)	20	6	0	26
1	Incompatible	12 (S4, S9)	13 (S4, S9)	60	10	1	71	1.78926
2	Incompatible	12 (S4, S9)	13 (S4, S9)	40	6	1	47
3	Incompatible	12 (S4, S9)	13 (S4, S9)	32	6	0	38
4	Incompatible	12 (S4, S9)	13 (S4, S9)	100	20	3	123
5	Incompatible	12 (S4, S9)	13 (S4, S9)	28	0	3	31
6	Incompatible	12 (S4, S9)	13 (S4, S9)	100	18	1	119
7	Incompatible	12 (S4, S9)	13 (S4, S9)	28	4	0	32
8	Incompatible	12 (S4, S9)	13 (S4, S9)	36	6	0	42
1	Self-pollination	15 (S10, S6)	15 (S10, S6)	32	0	0	32	0
2	Self-pollination	15 (S10, S6)	15 (S10, S6)	16	0	0	16
3	Self-pollination	15 (S10, S6)	15 (S10, S6)	32	0	0	32
4	Self-pollination	15 (S10, S6)	15 (S10, S6)	32	0	0	32
5	Self-pollination	15 (S10, S6)	15 (S10, S6)	44	0	0	44
6	Self-pollination	15 (S10, S6)	15 (S10, S6)	28	0	0	28
7	Self-pollination	15 (S10, S6)	15 (S10, S6)	24	0	0	24
8	Self-pollination	15 (S10, S6)	15 (S10, S6)	36	0	0	36
9	Self-pollination	15 (S10, S6)	15 (S10, S6)	80	0	0	80
10	Self-pollination	15 (S10, S6)	15 (S10, S6)	28	0	0	28
11	Self-pollination	15 (S10, S6)	15 (S10, S6)	56	4	0	60
