# Supplementary material for: Gametophytic self-incompatibility in Andean capuli (Prunus serotina subsp. capuli): allelic diversity at the S-RNase locus influences normal pollen-tube formation during fertilization
Source: PeerJ. 2020 Aug 31;8:e9597. doi: 10.7717/peerj.9597 (PMC7469932; doi:10.7717/peerj.9597)
Supplement: Table S2 — For alleles S2, S6 and S11 only the Intron I sequence could be retrieved and submitted. [file peerj-08-9597-s004.docx]

| ***P. serotina S*-alleles** | **GenBank Accession Number** | **Sequence Submitted** |
| --- | --- | --- |
| **S1** | MN098833 | Full length |
| **S2** | MN098834 | Intron I |
| **S3** | MN098835 | Full length |
| **S4** | MN098836 | Full length |
| **S5** | MN098837 | Full length |
| **S6** | MN098838 | Intron I |
| **S7** | MN098839 | Full length |
| **S8** | MN098840 | Full length |
| **S9** | MN098841 | Full length |
| **S10** | MN098842 | Full length |
| **S11** | MN098843 | Intron I |
| **S12** | MN098844 | Full length |
| **S13** | MN098845 | Full length |
| **S14** | MN098846 | Full length |
